# Supplementary material for: Endocycle-related tubular cell hypertrophy and progenitor proliferation recover renal function after acute kidney injury
Source: PubMed Central journal article supplement (PMC5890293; doi:10.1038/s41467-018-03753-4), 2018-04-09
Supplement: 41467_2018_3753_MOESM1_ESM.pdf [file 41467_2018_3753_MOESM1_ESM.pdf]

1 **Endocycle-related tubular cell hypertrophy and progenitor proliferation recover renal function after**  
2 **acute kidney injury**

3 Lazzeri et al.

4

5 **Supplementary Information**

6

7

8

9

10

11

12

13

14

15

16

17

18

19

20

21

22

23

24

25

26

27

28



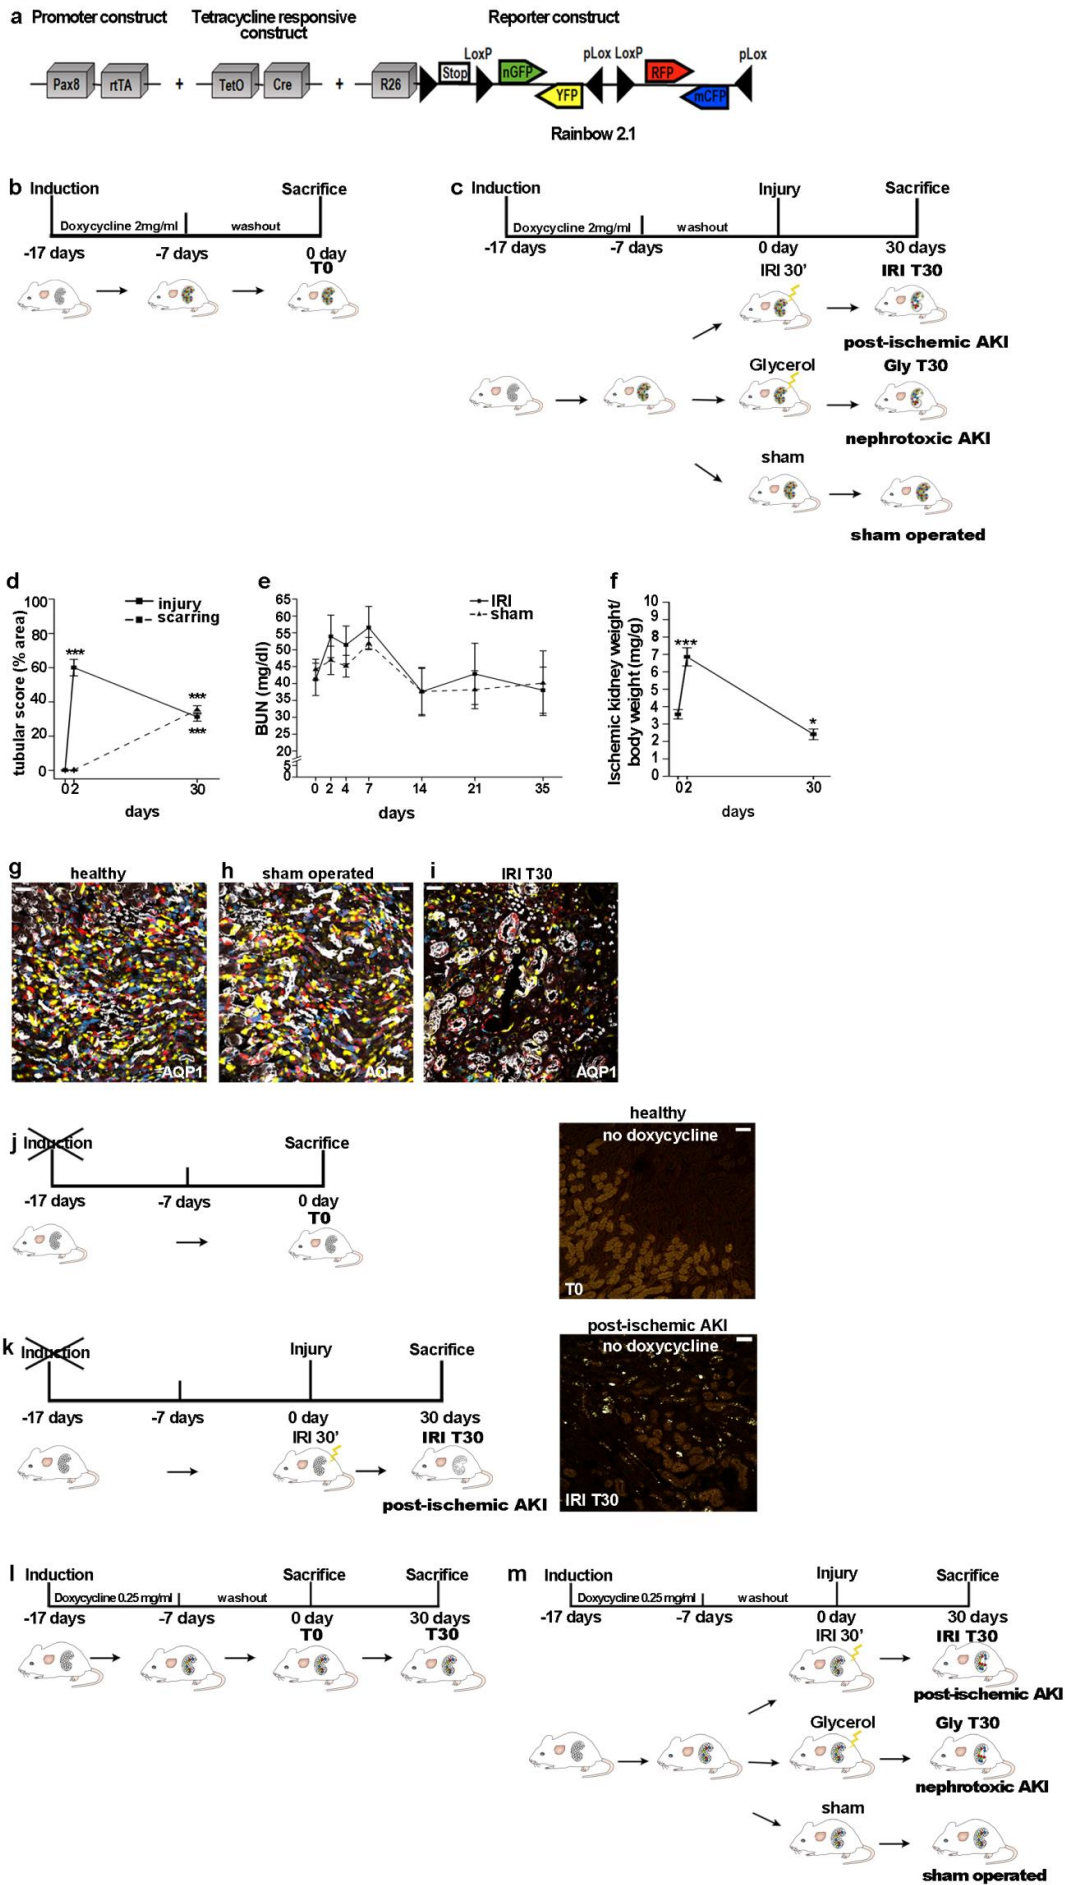

31 **Supplementary Figure 1. Generation of Pax8/Confetti mice.**

32 a) The inducible *Pax8.rtTA;TetO.Cre;R26.Confetti* (Pax8/Confetti) mouse is produced by crossing the  
33 *Pax8.rtTA* transgenic mice with *TetO.Cre* and *R26-Confetti* transgenic mice. The triple transgenic mouse  
34 constitutively expresses *rtTA* in Pax8+ cells but does not express the reporter proteins in any cell type while  
35 maintained on water not containing doxycycline. When included in the water, doxycycline binds to *rtTA*,  
36 allowing the transcription of Cre recombinase controlled by the *TetO* element. The Cre protein will  
37 specifically cut out or invert the floxed fluorochrome sequences and then turn on GFP, YFP, CFP or RFP  
38 expression. After doxycycline withdrawal, these Pax8+ cells will permanently express one out of four  
39 reporters, whereas any all that acquire Pax8 expression will not express the fluorescent reporters.

40 b, c) Experimental schemes.

41 d) Percentage of kidney area with tubular injury after IRI in Pax8/Confetti mice (n=5 mice per group). One-  
42 way ANOVA post-hoc Tukey; \*\*\*p<0.001 vs. day 0.

43 e) BUN levels in sham-operated mice and in ischemic Pax8/Confetti mice at different time points. Data are  
44 mean ± SEM from 5 mice in each group, one-way ANOVA post-hoc Tukey; NS at each time point IRI vs.  
45 sham-operated mice.

46 f) Kidney weight normalized to body weight after IRI in Pax8/Confetti mice (n=5 mice per group). One-way  
47 ANOVA post-hoc Tukey, \*\*\*p<0.001 and \*p<0.01 vs. day 0.

48 g-i) Representative images of a kidney section of Pax8/Confetti mice after staining with anti-AQP1 antibody  
49 (white) in healthy (n=5) (g), in sham-operated mice (n=4) (h) and at day 30 after IRI (n=4) (IRI T30, i).

50 j, k) Experimental schemes and representative images of the absence of basal Cre recombinase activity in the  
51 kidney of Pax8/Confetti healthy mice (n=3) analysed at day 0 (T0) (j) and at day 30 after IRI (n=3, IRI T30)  
52 (k).

53 l, m) Experimental schemes.

54 Scale bars 40 µm.

55

56

57

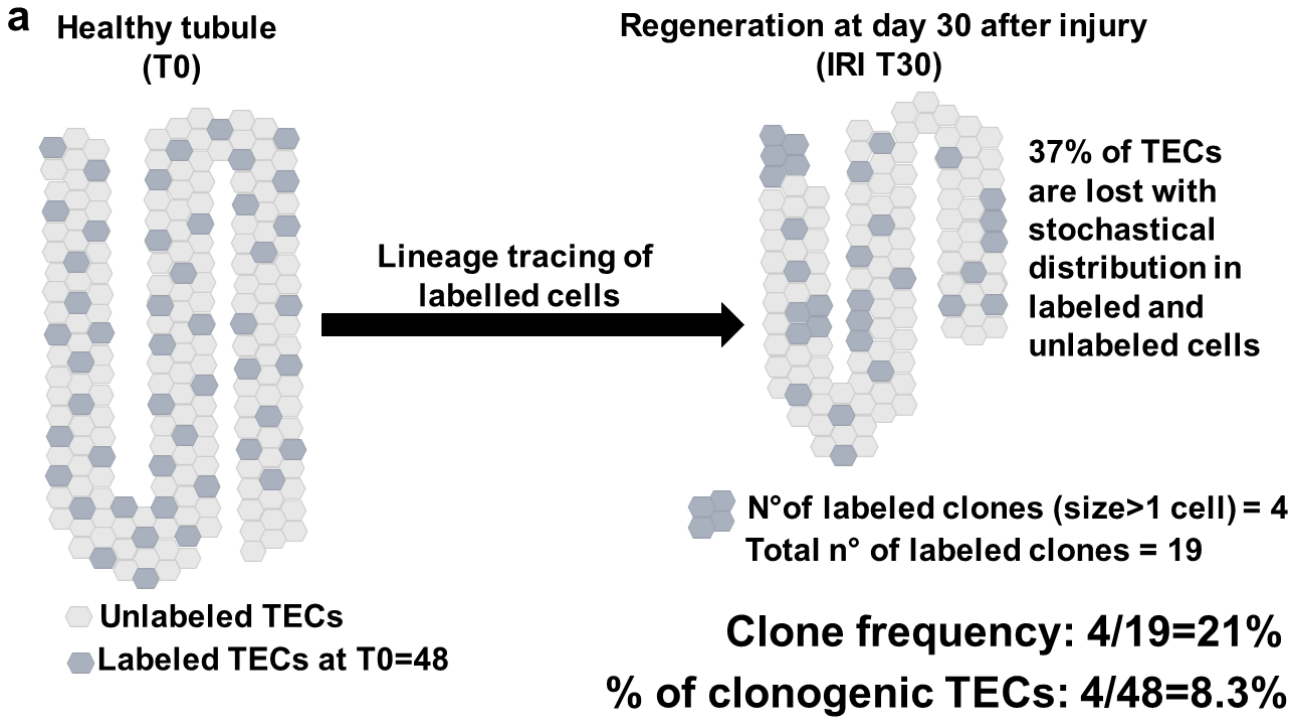

58

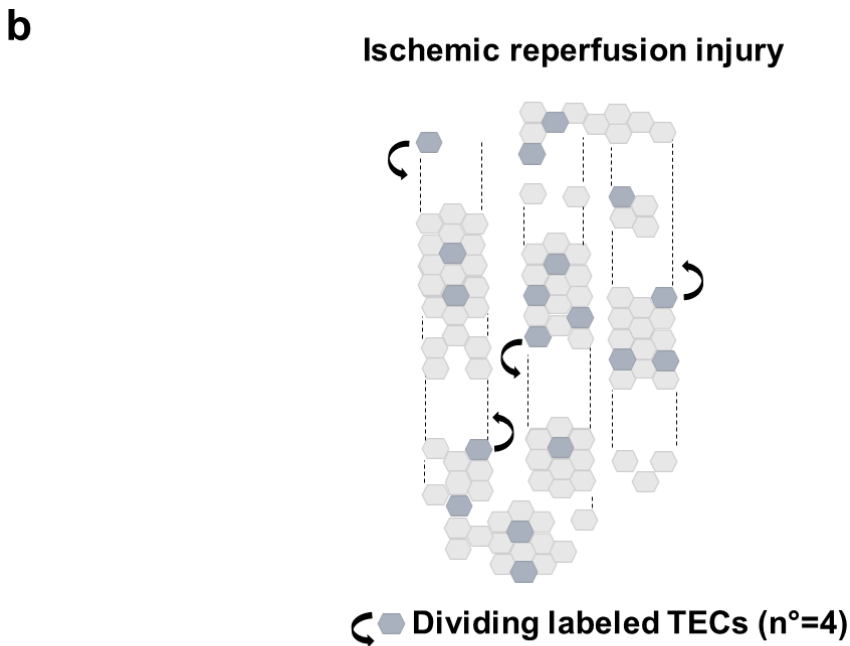

59

60 **Supplementary Figure 2. Representative scheme of analysis performed in Pax8/Confetti mice**

61 a) Representative scheme showing clone frequency and % of clonogenic TECs in Pax8 mice at day 30 after  
62 injury.

63 b) Representative scheme of TEC loss after ischemic reperfusion injury.

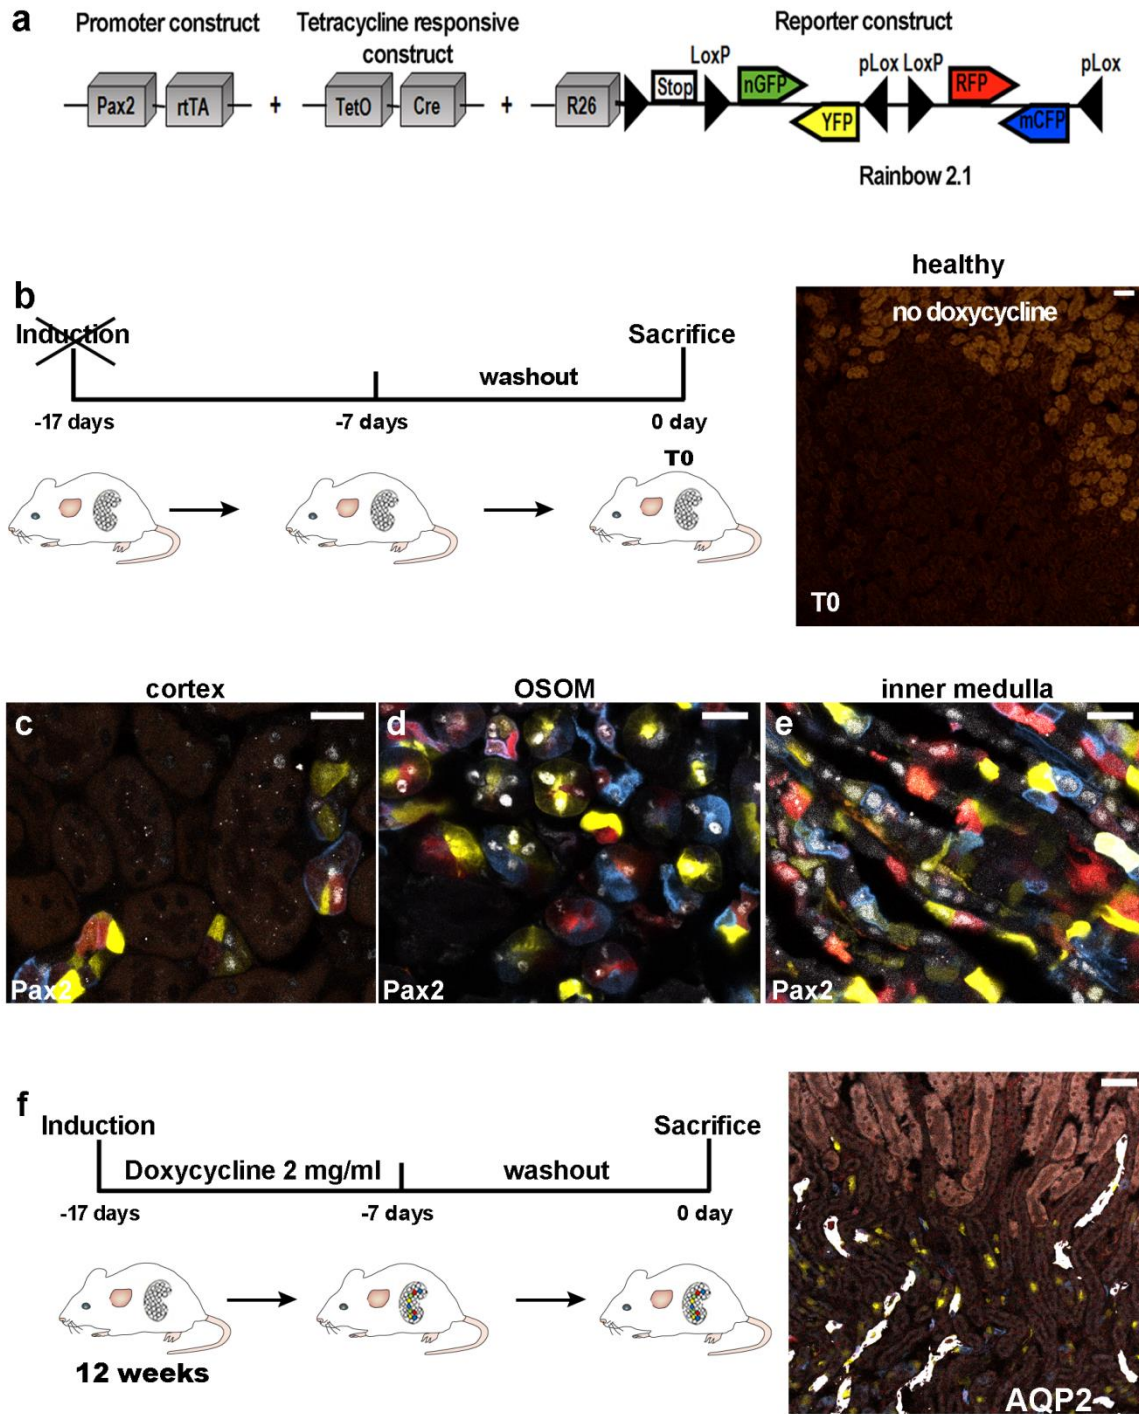

64

65 **Supplementary Figure 3. Generation of Pax2/Confetti mice.**

66 a) The inducible Pax2.rtTA;TetO.Cre;R26.Confetti (Pax2/Confetti) mouse is produced by crossing the  
 67 Pax2.rtTA transgenic mice with TetO.Cre and R26-Confetti transgenic mice. The triple transgenic mouse  
 68 constitutively expresses rtTA in Pax2+ cells but does not express the reporter proteins in any cell type while  
 69 maintained on water not containing doxycycline. When included in the water, doxycycline binds to rtTA,  
 70 allowing the transcription of Cre recombinase controlled by the TetO element. The Cre protein will

71 specifically cut out or invert the floxed fluorochrome sequences and then turn on GFP, YFP, CFP or RFP  
72 expression. After doxycycline withdrawal, these Pax2<sup>+</sup> cells will permanently express one out of four  
73 reporters, whereas any all that acquire Pax2 expression will not express the fluorescent reporters.

74 b) Experimental scheme and representative image of the absence of basal Cre recombinase activity in the  
75 kidney of Pax2/Confetti healthy mice (n=3) analyzed at day 0 (T0). Scale bar 40  $\mu$ m.

76 c-e) Representative images of a kidney section showing the staining of anti-Pax2 antibody (white) in the  
77 cortex (c), in OSOM (d) and in inner medulla (e) in healthy Pax2/Confetti mice (n=4). Scale bars 20  $\mu$ m

78 f) Experimental scheme of Pax2/Confetti mice induced at 12 weeks of age and representative image of a  
79 kidney section after staining with AQP2 antibody (white) (n=3).

80 Scale bar 40  $\mu$ m.

81

82

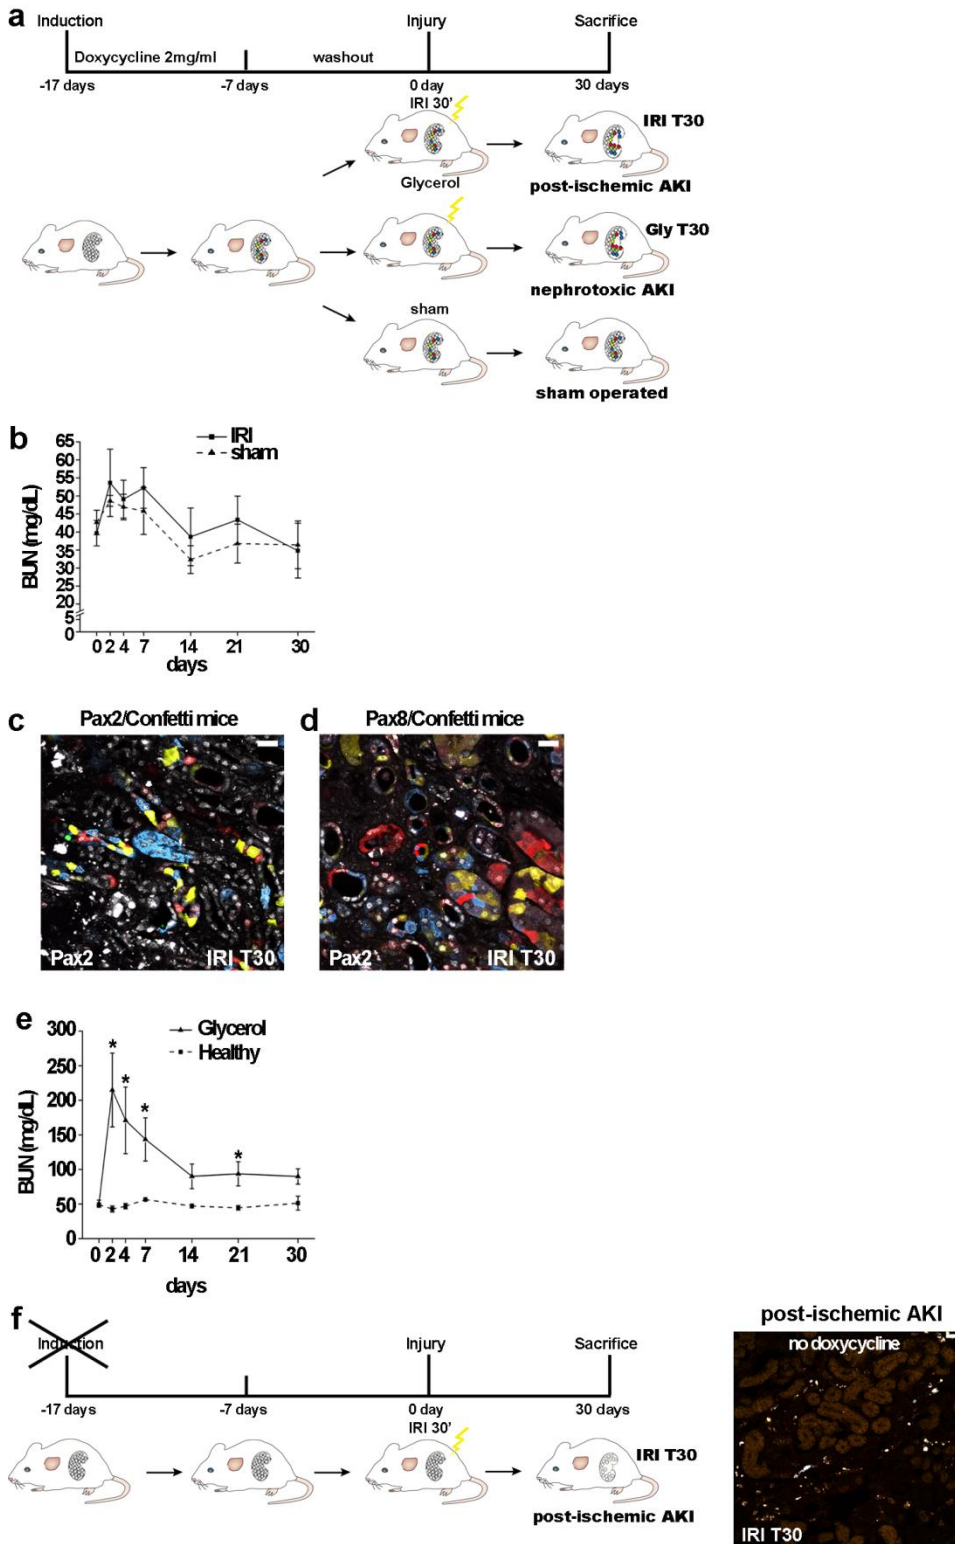

83

84 **Supplementary Figure 4. Experimental scheme in Pax2/Confetti mice.**

85 a) Experimental scheme



86 b) BUN levels in sham-operated mice and in ischemic Pax2/Confetti mice at different time points. Data are  
87 mean  $\pm$  SEM from 5 sham-operated mice and 6 ischemic mice, one-way ANOVA post-hoc Tukey; NS at  
88 each time point IRI vs. sham-operated mice.

89 c, d) Representative images of a kidney section showing the staining of anti-Pax2 antibody (white) in OSOM  
90 of Pax2/Confetti mice (n=5) (c) and of Pax8/Confetti mice (n=4) (d) at day 30 after IRI. Scale bars 20  $\mu$ m.

91 e) BUN measurement in healthy Pax2/Confetti mice (n=4) and after nephrotoxic AKI (n=6). One-way  
92 ANOVA post-hoc Tukey.

93 f) Experimental scheme and representative image of the absence of basal Cre recombinase activity in the  
94 kidney of Pax2/Confetti healthy mice (n=3) analyzed at day 30 after IRI (n=3, IRI T30).

95 Scale bar 40  $\mu$ m.

96

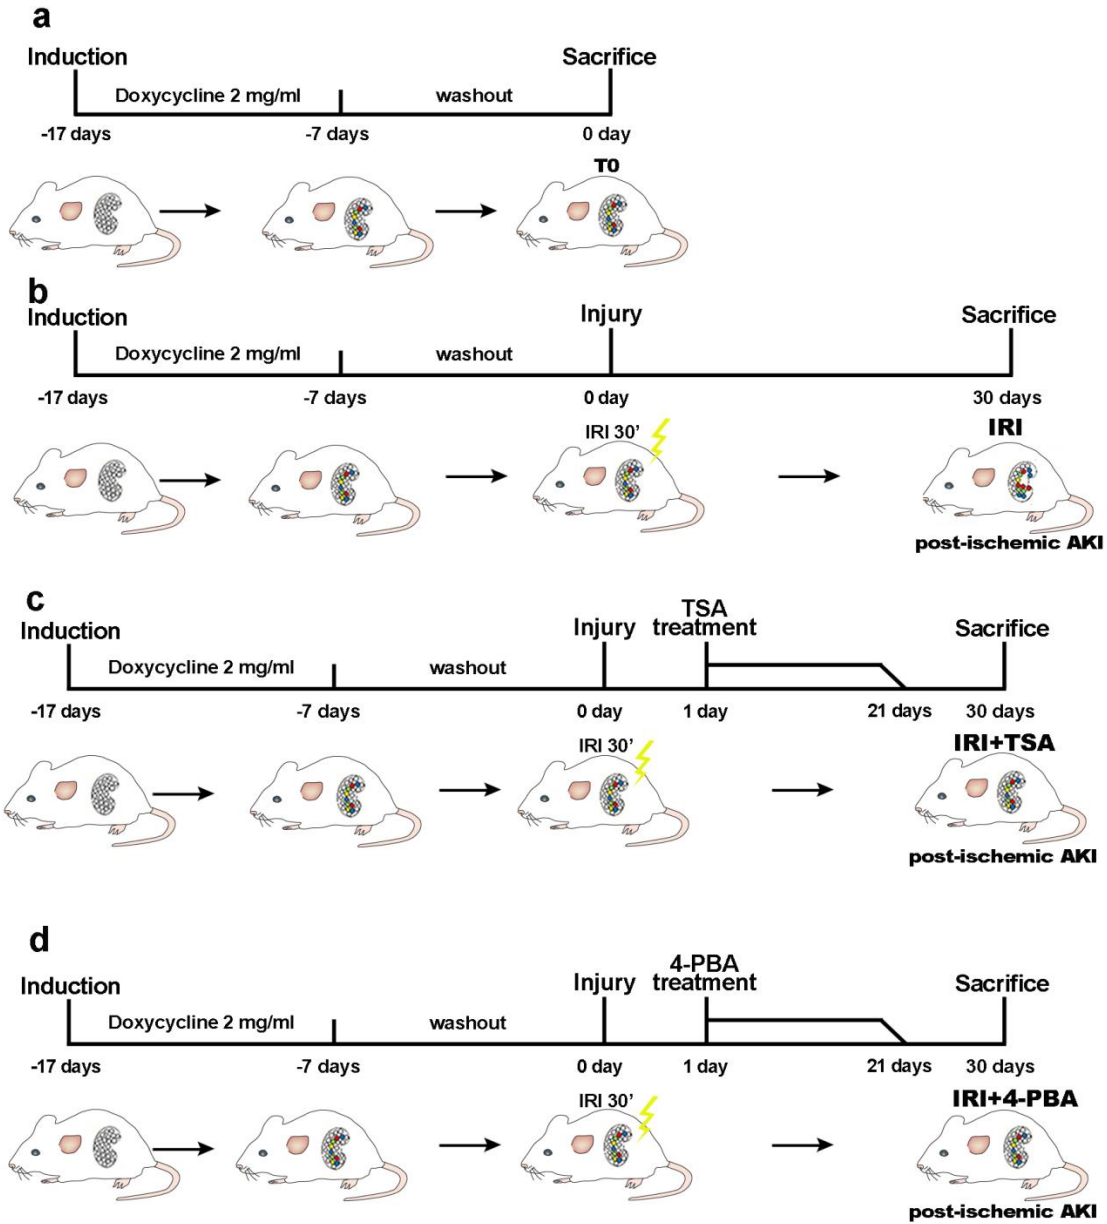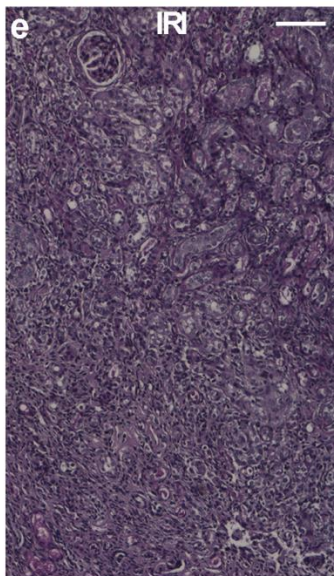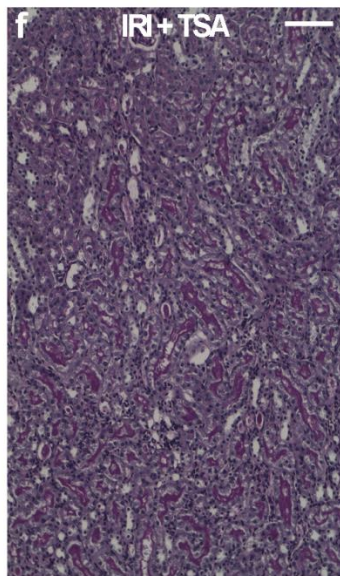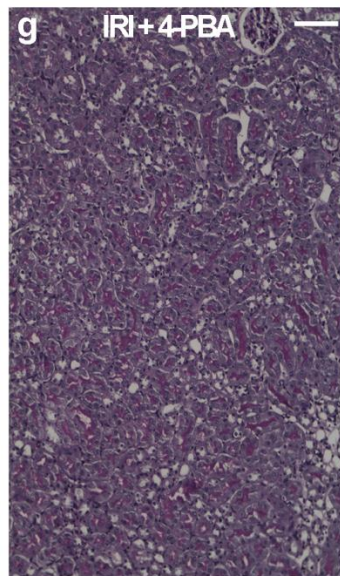

98 **Supplementary Figure 5. Experimental schemes of Pax2/Confetti mice treated with TSA and 4-PBA.**  
99 a-d) Experimental schemes.  
100 e-g) Periodic Acid-Schiff (PAS)-stained kidney sections in Pax2/Confetti mice at day 30 after IRI (e) (n=6)  
101 and at day 30 after IRI + TSA (f) (n=4) or 4-PBA treatment (g) (n=6). Scale bars 100  $\mu\text{m}$ .  
102

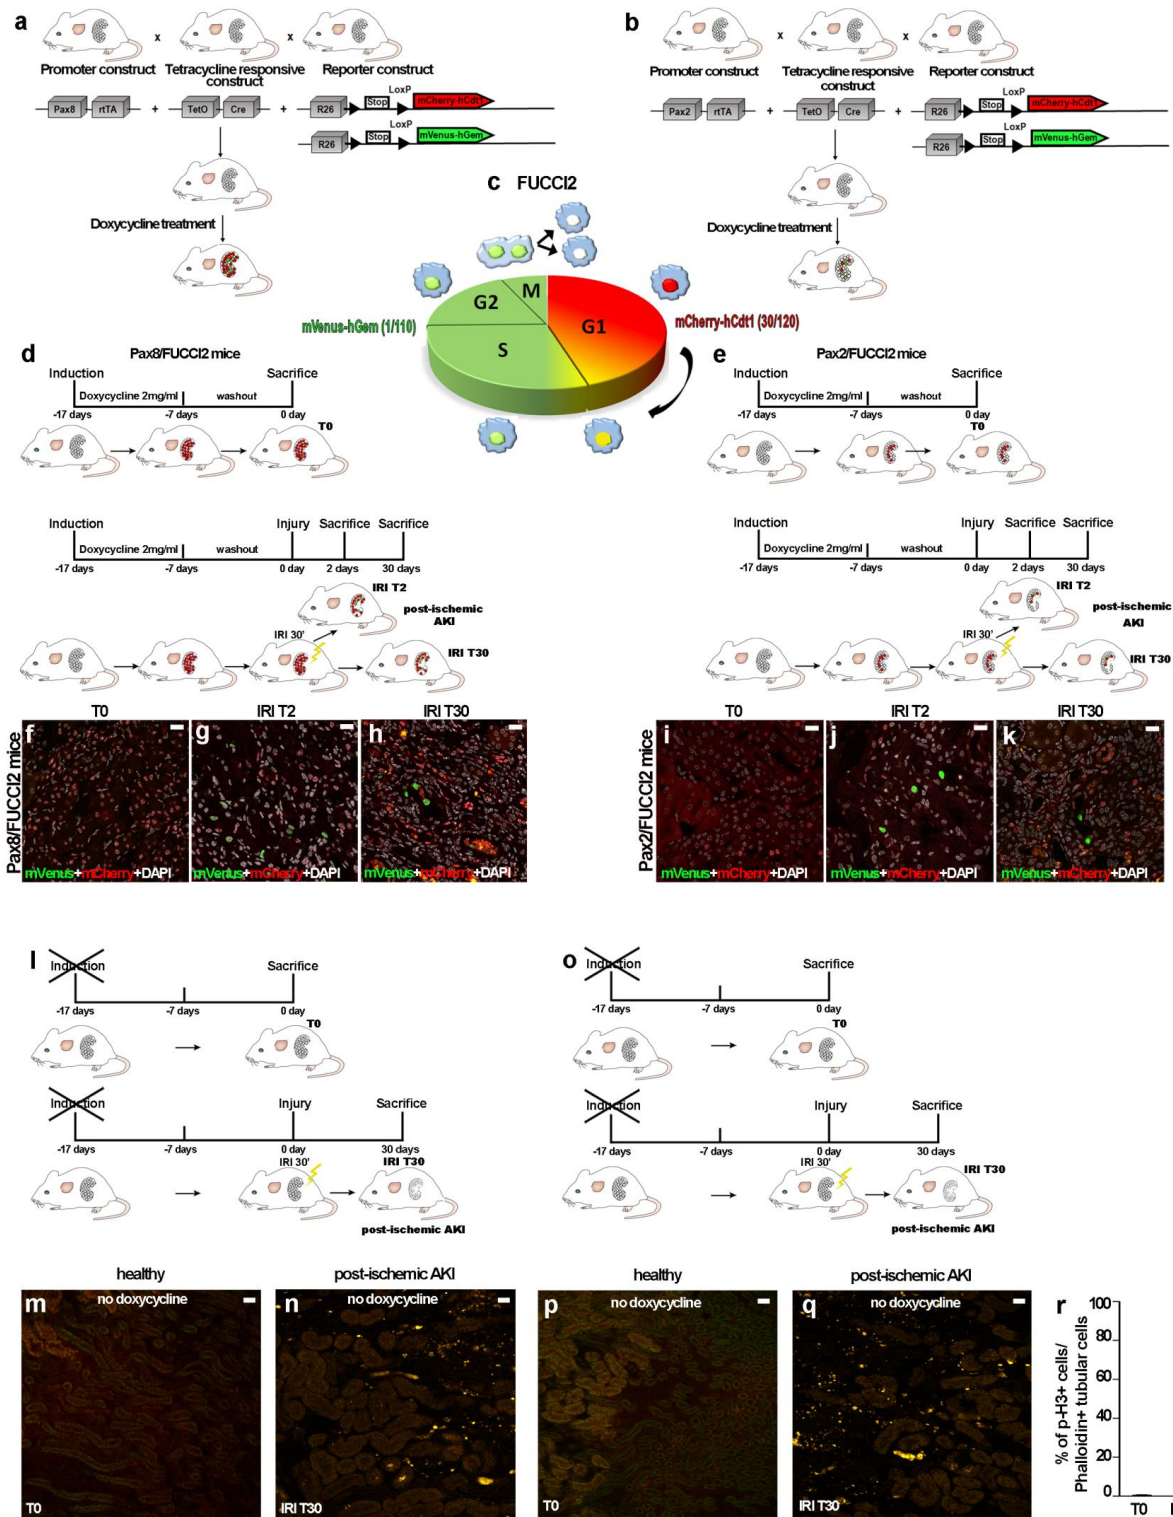

103

104 **Supplementary Figure 6. Generation of inducible Pax8/FUCCI2 mice and inducible Pax2/FUCCI2**  
 105 **mice.**

106 a) The inducible *Pax8.rtTA;TetO.Cre;R26.FUCCI2* (Pax8/FUCCI2) mouse is produced by crossing the  
 107 *Pax8.rtTA* transgenic mice with *TetO.Cre* and *Rosa26-FUCCI2* transgenic mice. The quadruple transgenic  
 108 mouse constitutively expresses *rtTA* in Pax8+ cells but does not express the reporter proteins in any cell type

109 while maintained on water not containing doxycycline. When doxycycline is included in the water, Pax8+  
110 cells express *rtTA* that binds the *TetO* element so that Cre recombinase expression is induced. The Cre  
111 protein will specifically cut out the floxed Stop cassette and then turn on mCherry-hCdt1(30/120) or  
112 mVenus-hGem(1/110) expression. Even after withdrawal of doxycycline from the water, these Pax8+ cells  
113 will permanently express the reporters, whereas any new Pax8+ cells that develop after doxycycline  
114 exposure will not express the fluorescent reporters.

115 b) The inducible *Pax2.rtTA;TetO.Cre;R26.FUCCI2* (Pax2/FUCCI2) mouse is produced by crossing the  
116 *Pax2.rtTA* transgenic mice with *TetO.Cre* and *Rosa26-FUCCI2* transgenic mice. The quadruple transgenic  
117 mouse constitutively expresses *rtTA* in Pax2+ cells but does not express the reporter proteins in any cell type  
118 while maintained on water not containing doxycycline. When doxycycline is included in the water, Pax2+  
119 cells express *rtTA* that binds the *TetO* element so that Cre recombinase expression is induced. The Cre  
120 protein will specifically cut out the floxed Stop cassette and then turn on mCherry-hCdt1(30/120) or  
121 mVenus-hGem (1/110) expression. Even after withdrawal of doxycycline from the water, these Pax2+ cells  
122 will permanently express the reporters, whereas any new Pax2+ cells that develop after doxycycline  
123 exposure will not express the fluorescent reporters.

124 c) Schematic representation of cell-cycle phases labelled with mCherry-hCdt1(30/120) and mVenus-hGem  
125 (1/110) reporters. mCherry-hCdt1(30/120) is expressed in G1, whereas mVenus-hGem (1/110) is expressed  
126 in S/G2/M. Cells at the G1/S boundary express both mCherry-hCdt1(30/120) that mVenus-hGem (1/110).  
127 The FUCCI2 reporter has a small black phase when the cell goes out of mitosis. G1, gap 1 phase; S,  
128 synthesis; G2, gap 2 phase; M, mitosis.

129 d,e) Experimental schemes

130 f-h) mCherry+ cells (red) in G1 phase and mVenus+ cells (green) in S/G2/M phase of cell-cycle in  
131 Pax8/FUCCI2 mice at day 0 (n=4) (f), 2 (n=4) (g) and 30 after IRI (n=4) (h). DAPI counterstains nuclei  
132 (white). Scale bars 20  $\mu$ m.

133 i-k) mCherry+ cells (red) in G1 phase and mVenus+ cells (green) in S/G2/M phase of cell-cycle in  
134 Pax2/FUCCI2 mice at day 0 (n=4) (i), 2 (n=4) (j) and 30 after IRI (n=4) (k). DAPI counterstains nuclei  
135 (white). Scale bars 20  $\mu$ m.

136 l-n) Experimental scheme and representative images of the absence of basal Cre recombinase activity in the

137 kidney of Pax8/FUCCI2 healthy mice (n=3) analysed at day 0 (T0) (m) and at day 30 after IRI (n=3, IRI  
138 T30) (n). Scale bars 40  $\mu$ m.

139 o-q) Experimental scheme and representative images of the absence of basal Cre recombinase activity in the  
140 kidney of Pax2/FUCCI2 healthy mice (n=3) analysed at day 0 (T0) (p) and at day 30 after IRI (n=3, IRI T30)  
141 (q).

142 r) Percentage of p-H3+ cells over Phalloidin+ TECs at day 0 (T0), at day 2 after IRI (IRI T2) and at day 30  
143 after IRI (IRI T30) (n=3 per group).

144 Scale bars 40  $\mu$ m.

145

### Pax8/FUCCI2 IRI T30

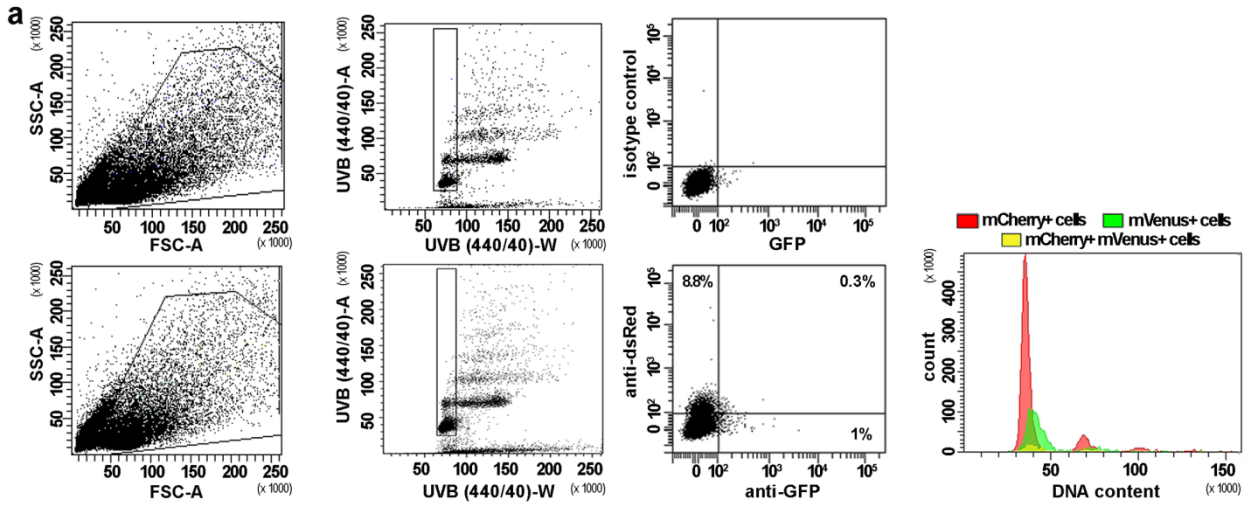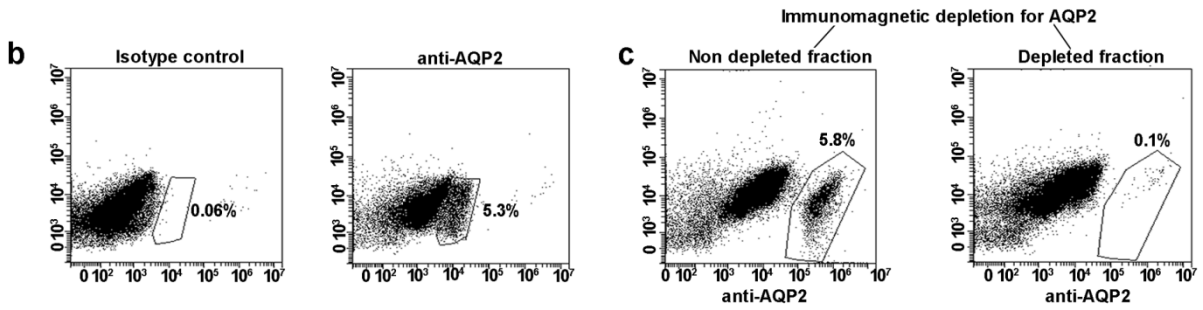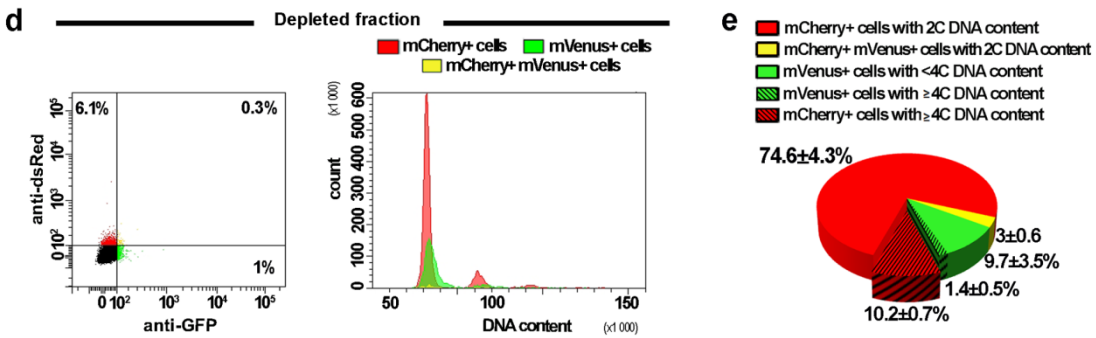

### Pax2/FUCCI2 IRI T30

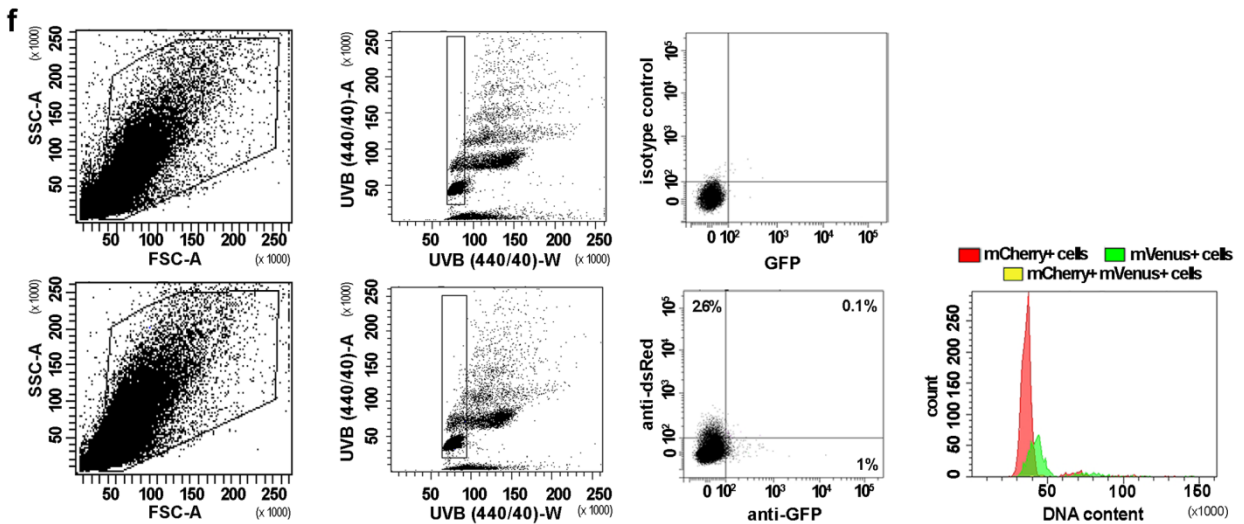

147 **Supplementary Figure 7. Gating strategy and additional cell-cycle analysis in FUCCI2 mice.**

148 a) Gating strategy of freshly isolated total renal cells of Pax8/FUCCI2 mice at day 30 after IRI (IRI T30). A  
149 representative experiment out of 5 is shown. Same experiment shown in Fig. 6w.

150 b) FACS analysis showed the percentage of AQP2+ cells in freshly isolated total renal cells of Pax8/FUCCI2  
151 mice at day 30 after IRI (n=3) compared to the isotype control. At least 10,000 cells were analysed for each  
152 mouse. A representative experiment out of 3 is shown.

153 c) Immunomagnetic depletion of AQP2+ cells. At least 10,000 cells were analysed for each mouse (n=3). A  
154 representative experiment out of 3 is shown.

155 d) FACS and cell-cycle analysis in Pax8/FUCCI2 mice after depletion of AQP2+ cells at day 30 after IRI  
156 (n=3). More than 50,000 cells were analysed for each mouse. A representative experiment out of 3 is shown.

157 e) Percentages of mCherry+ cells, mVenus+ cells and mCherry+ mVenus+ cells over total FUCCI2 cells  
158 based on DNA content in Pax8/FUCCI2 mice after depletion of AQP2+ cells at day 30 after IRI. Data are  
159 mean  $\pm$  SEM from 3 mice.

160 f) Gating strategy of freshly isolated total renal cells of Pax2/FUCCI2 mice at day 30 after IRI (IRI T30). A  
161 representative experiment out of 5 is shown. Same experiment shown in Fig. 6x.

162



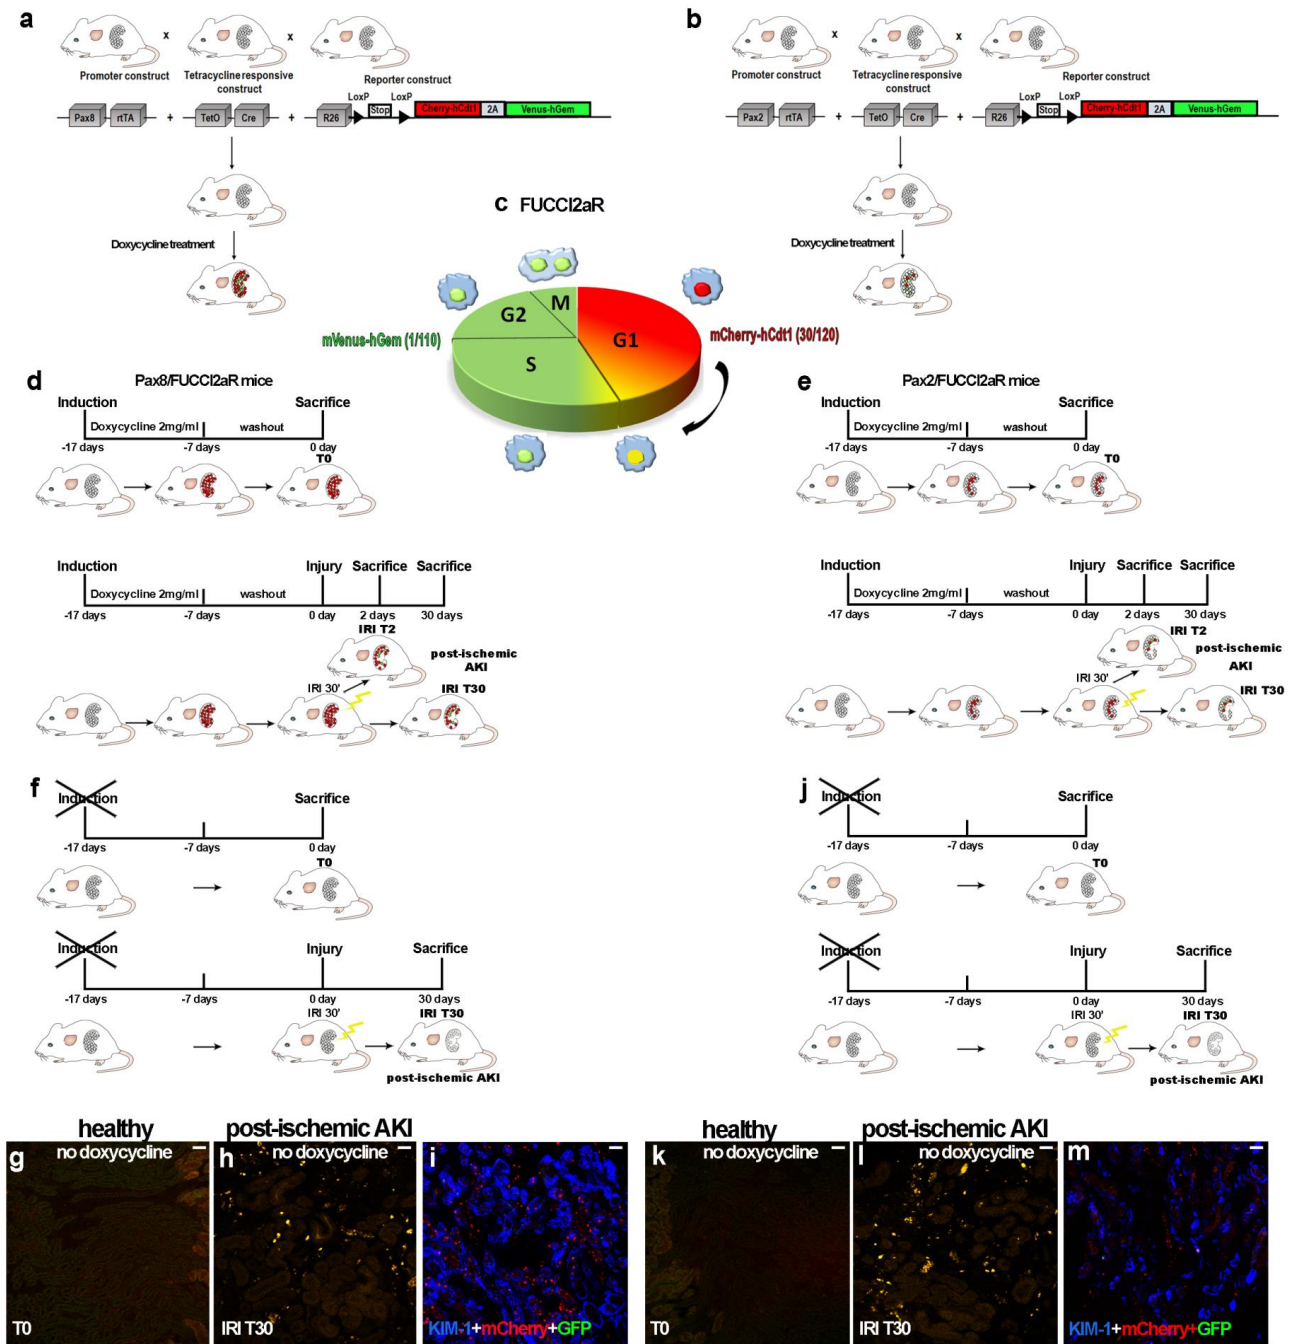

163

164 **Supplementary Figure 8. Generation of inducible Pax8/FUCCI2aR mice and inducible**  
 165 **Pax2/FUCCI2aR mice.**

166 a) The inducible Pax8.r<sup>rtTA</sup>;TetO.Cre;R26.FUCCI2aR (Pax8/FUCCI2aR) mouse is produced by crossing the  
 167 Pax8.r<sup>rtTA</sup> transgenic mice with TetO.Cre and Rosa26-FUCCI2aR transgenic mice. The triple transgenic  
 168 mouse constitutively expresses r<sup>rtTA</sup> in Pax8+ cells but does not express the reporter proteins in any cell type  
 169 while maintained on water not containing doxycycline. When doxycycline is included in the water, Pax8+  
 170 cells express r<sup>rtTA</sup> that binds the TetO element so that Cre recombinase expression is induced. The Cre

171 protein will specifically cut out the floxed Stop cassette and then turn on mCherry-hCdt1(30/120)-mVenus-  
172 hGem(1/110) expression. Even after withdrawal of doxycycline from the water, these Pax8+ cells will  
173 permanently express the reporters, whereas any new Pax8+ cells that develop after doxycycline exposure  
174 will not express the fluorescent reporters.

175 b) The inducible Pax2.rfTA;TetO.Cre;R26.FUCCI2aR (Pax2/FUCCI2aR) mouse is produced by crossing the  
176 Pax2.rfTA transgenic mice with TetO.Cre and Rosa26-FUCCI2aR transgenic mice. The triple transgenic  
177 mouse constitutively expresses rtTA in Pax2+ cells but does not express the reporter proteins in any cell type  
178 while maintained on water not containing doxycycline. When doxycycline is included in the water, Pax2+  
179 cells express rtTA that binds the TetO element so that Cre recombinase expression is induced. The Cre  
180 protein will specifically cut out the floxed Stop cassette and then turn on mCherry-hCdt1(30/120)-mVenus-  
181 hGem (1/110) expression. Even after withdrawal of doxycycline from the water, these Pax2+ cells will  
182 permanently express the reporters, whereas any new Pax2+ cells that develop after doxycycline exposure  
183 will not express the fluorescent reporters.

184 c) Schematic representation of cell-cycle phases labelled with mCherry-hCdt1(30/120) and mVenus-hGem  
185 (1/110) reporters. mCherry-hCdt1 (30/120) is expressed in G1, whereas mVenus-hGem (1/110) is expressed  
186 in S/G2/M. Cells at the G1/S boundary express both mCherry-hCdt1(30/120) that mVenus-hGem (1/110).  
187 G1, gap 1 phase; S, synthesis; G2, gap 2 phase; M, mitosis.

188 d, e) Experimental schemes.

189 f-h) Experimental schemes and representative images of the absence of basal Cre recombinase activity in the  
190 kidney of Pax8/FUCCI2aR healthy mice (n=3) analysed at day 0 (T0) (g) and at day 30 after IRI (n=3, IRI  
191 T30) (h).

192 i) Expression of KIM-1(blue) in Pax8/FUCCI2aR at day 30 after IRI (n=5).

193 j-l) Experimental schemes and representative images of the absence of basal Cre recombinase activity in the  
194 kidney of Pax2/FUCCI2aR healthy mice (n=3) analysed at day 0 (T0) (k) and at day 30 after IRI (n=3, IRI  
195 T30) (l).

196 m) Expression of KIM-1 (blue) in Pax2/FUCCI2aR at day 30 after IRI (n=5).

197 Scale bars 40  $\mu$ m.

198

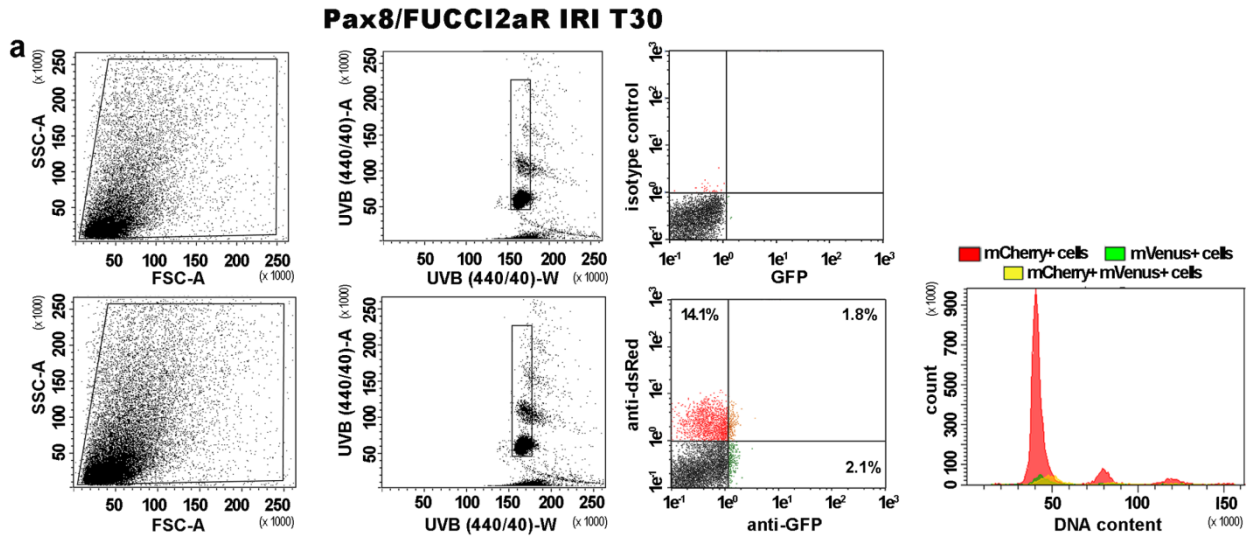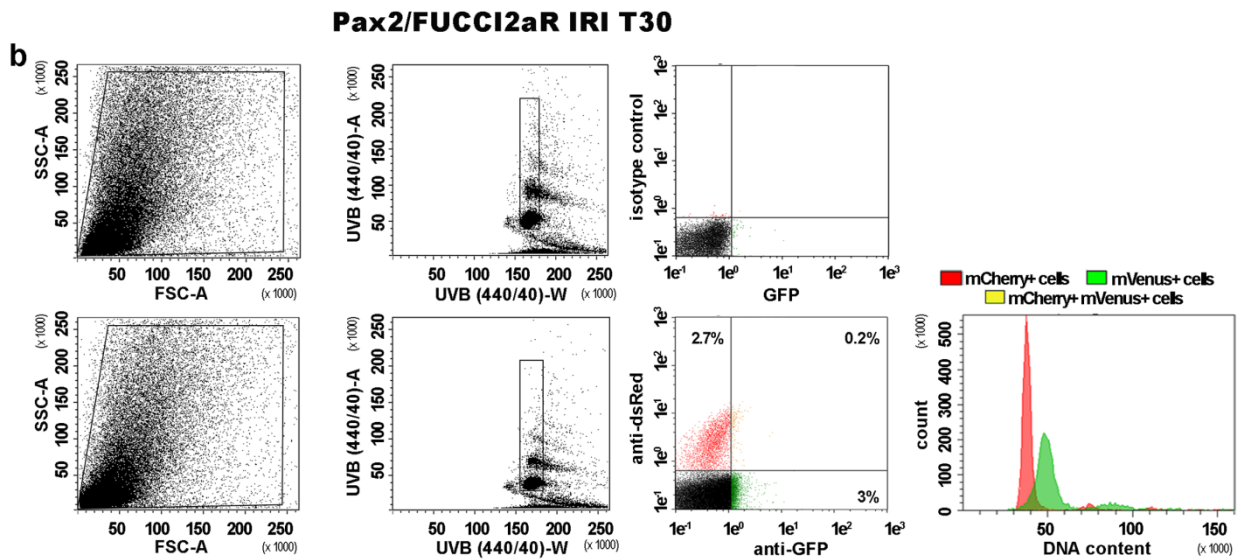

199

200 **Supplementary Figure 9. Gating strategy in Pax8/ FUCCI2aR and Pax2/ FUCCI2aR mice**

201 a) Gating strategy of freshly isolated total renal cells of Pax8/FUCCI2aR mice at day 30 after IRI (IRI T30) .

202 A representative experiment out of 4 is shown. Same experiment shown in Fig. 7,h.

203 b) Gating strategy of freshly isolated total renal cells of Pax2/FUCCI2aR mice at day 30 after IRI (IRI T30).

204 A representative experiment out of 4 is shown. Same experiment shown in Fig. 7i.

205

206 **Supplementary Methods**

207 **Representative calculations in Pax2/Confetti mice**

● ● Pax2/Confetti cells  
● ● TECs  
● TECs

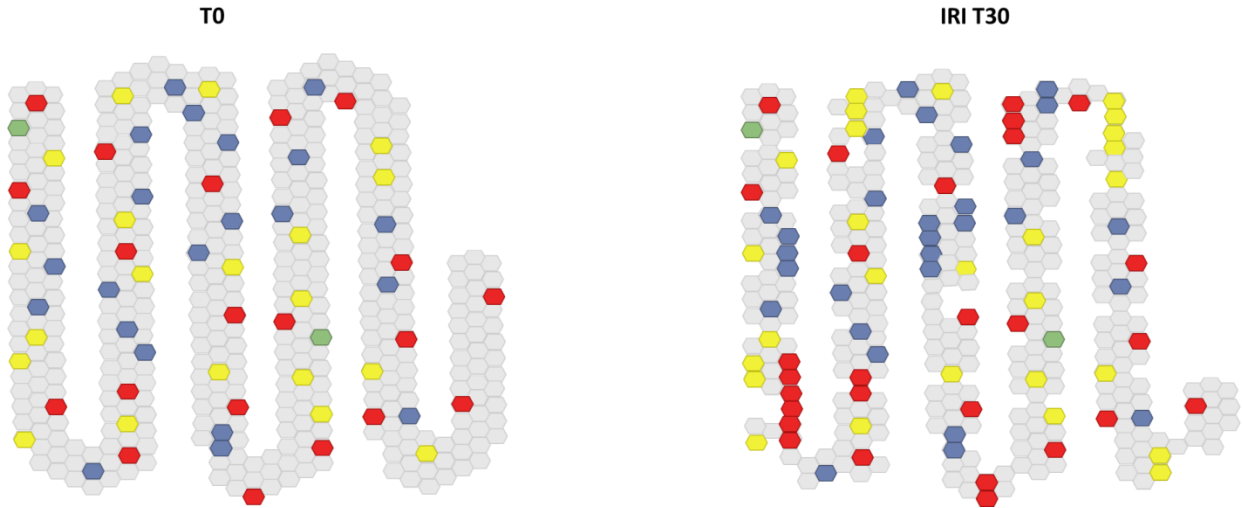

208

| Clone size                | n° of clones |
|---------------------------|--------------|
| 1 cell                    | 62           |
| 2 cells                   | 1            |
| 3 cells                   | 0            |
| 4 cells                   | 0            |
| 5 cells                   | 0            |
| 6 cells                   | 0            |
| <b>Total n° of clones</b> | 63           |
| <b>Total Pax2+ cells</b>  | 64           |

| Clone size                | n° of clones |
|---------------------------|--------------|
| 1 cell                    | 49           |
| 2 cells                   | 7            |
| 3 cells                   | 3            |
| 4 cells                   | 2            |
| 5 cells                   | 0            |
| 6 cells                   | 1            |
| <b>Total n° of clones</b> | 62           |
| <b>Total Pax2+ cells</b>  | 86           |

209

210

211

**Clone frequency of Pax2+ cells at IRI T30 (Equation I in Methods)**

$$(n^\circ \text{ of clones of } n \text{ cells} / \text{total } n^\circ \text{ of clones}) \times 100$$

| Clone size | n° of clones | Clone frequency              |
|------------|--------------|------------------------------|
| 1 cell     | 49           | $49/62 \times 100 = 79.03\%$ |
| 2 cells    | 7            | $7/62 \times 100 = 11.29\%$  |
| 3 cells    | 3            | $3/62 \times 100 = 4.83\%$   |
| 4 cells    | 2            | $2/62 \times 100 = 3.22\%$   |
| 5 cells    | 0            | 0                            |
| 6 cells    | 1            | $1/62 \times 100 = 1.61\%$   |

212

**Percentage of clonogenic cells (Equation II in Methods)**

214 A) n° of new clones at IRI T30 =

$$\sum_{n=2}^9 (\text{clones composed of } n \text{ cells at IRI T30} - \text{clones composed of } n \text{ cells at T0})$$

215 B) % of clonogenic cells at IRI T30 in comparison to T0

$$(A / n^{\circ} \text{ of Pax2}^+ \text{ cells at T0}) \times 100$$

216 In this example:

| Clone size | n° at IRI T30 | n° at T0 | n° of new clones |
|------------|---------------|----------|------------------|
| 2 cells    | 7             | 1        | 7 - 1 = 6        |
| 3 cells    | 3             | 0        | 3 - 0 = 3        |
| 4 cells    | 2             | 0        | 2 - 0 = 2        |
| 5 cells    | 0             | 0        | 0                |
| 6 cells    | 1             | 0        | 1 - 0 = 1        |

217

218 A)  $\sum_{n=2}^6 (6; 3; 2; 0; 1 = 12)$

219 B)  $(12 / 64) \times 100 = 18.75\%$

220

221 **Percentage of new Pax2+ cells at IRI T30 (Equation III in Methods)**

222 C) n° of Pax2+ cells included in clones at IRI T30

$$\sum_{n=2}^9 [(\text{clones composed of } n \text{ cells at IRI T30} - \text{clones composed of } n \text{ cells at T0}) \times n]$$

223 D) n° of new Pax2+ cells at IRI T30 = n° of Pax2+ cells included in new clones - n° of cells that  
224 originated new clones\*

$$C - A$$

225 \*the n° of cells that originated new clones coincides with the n° of new clones at IRI T30 (A), because  
226 each clone is the progeny of one cell

227 E) % of new Pax2+ cells at IRI T30 in comparison to T0

$$(D / n^{\circ} \text{ of Pax2}^+ \text{ cells at T0}) \times 100$$

228

229

230

231

232

233 In this example

| Clone size | n° of new clones | n° of Pax2+ cells included in clones | n° of new Pax2+ cells |
|------------|------------------|--------------------------------------|-----------------------|
| 2 cells    | 6                | $6 \times 2 = 12$                    | $12 - 6 = 6$          |
| 3 cells    | 3                | $3 \times 3 = 9$                     | $9 - 3 = 6$           |
| 4 cells    | 2                | $2 \times 4 = 8$                     | $8 - 2 = 6$           |
| 5 cells    | 0                | 0                                    | 0                     |
| 6 cells    | 1                | $1 \times 6 = 6$                     | $6 - 1 = 5$           |

234

235 C)  $\sum_{n=2}^6 [12; 9; 8; 0; 6] = 35$

236 D)  $35 - 12 = 23$

237 E)  $(23/64) \times 100 = 35.9\%$

238

239 **Percentage of lost Pax2+ cells at IRI T30 (Equation IV in Methods)**

$$100 - [(n^\circ \text{ of Pax2}^+ \text{ cells at IRI T30} - D/n^\circ \text{ of Pax2}^+ \text{ cells at T0}) \times 100]$$

240 In this example

$$100 - [(86 - 23)/64] \times 100 = 1.56\%$$

241

242
