# Supplementary material for: Endocycle-related tubular cell hypertrophy and progenitor proliferation recover renal function after acute kidney injury
Source: PubMed Central journal article supplement (PMC5890293; doi:10.1038/s41467-018-03753-4), 2018-04-09
Supplement: 41467_2018_3753_MOESM3_ESM.pdf [file 41467_2018_3753_MOESM3_ESM.pdf]

## **Description of Additional Supplementary Files**

File Name: Supplementary Movie 1

Description: 3D analysis of a Pax2+ clone regenerating a long tubule segment.
